# Supplementary material
Source: publisher figshare collection journal article supplement (https://diabetesjournals.figshare.com/articles/dataset/_/14414495)

Figure S5

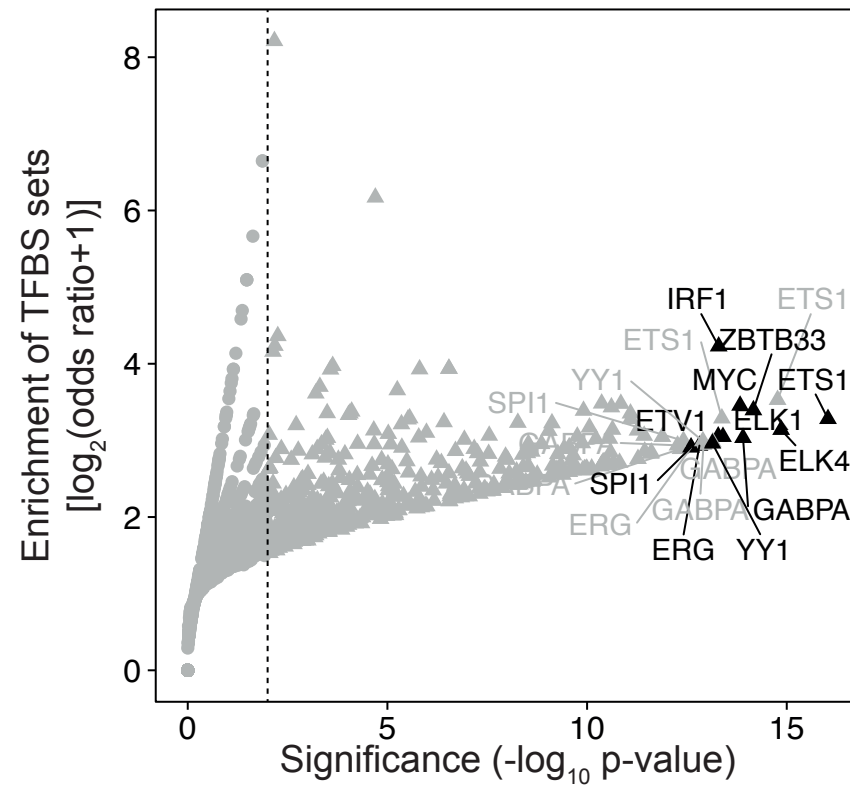

Supplement: Supplementary file 1 [file 1]

Figure S1

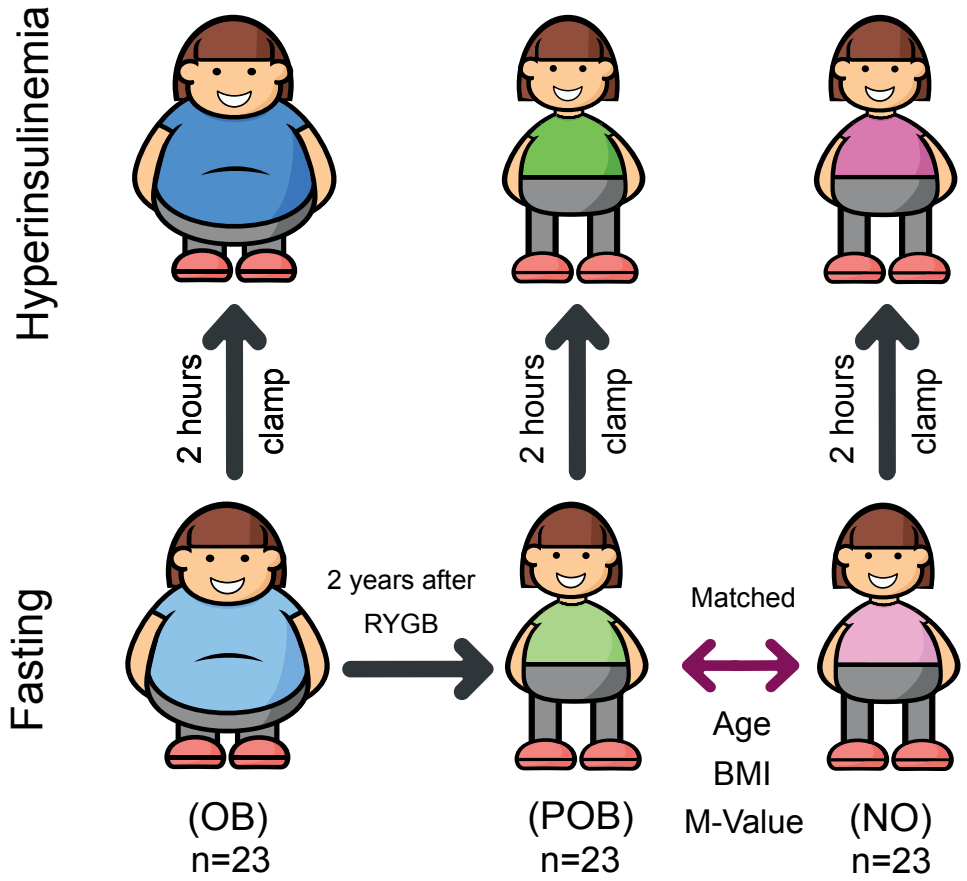

Supplement: Supplementary file 3 [file 1]

Figure S3

A

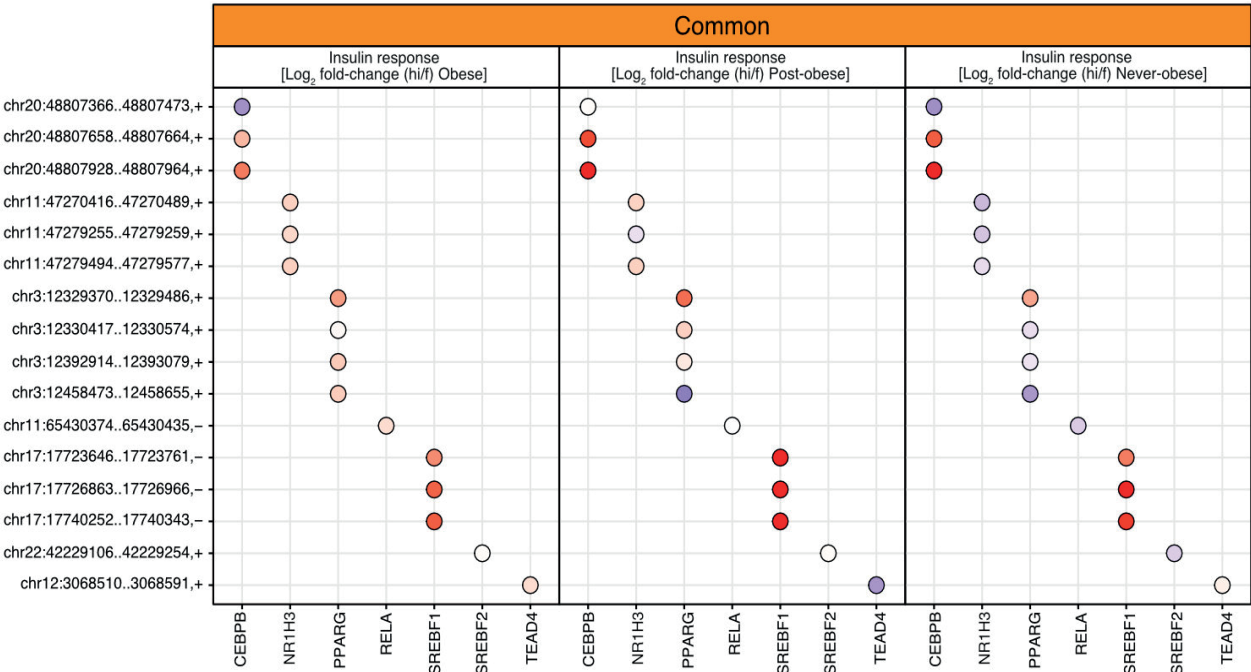

B

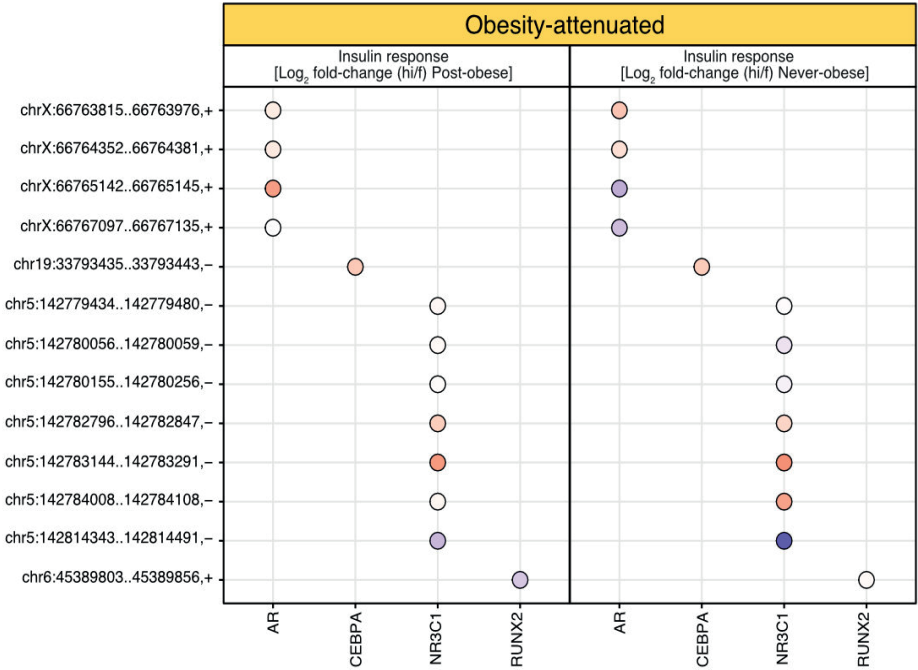

C

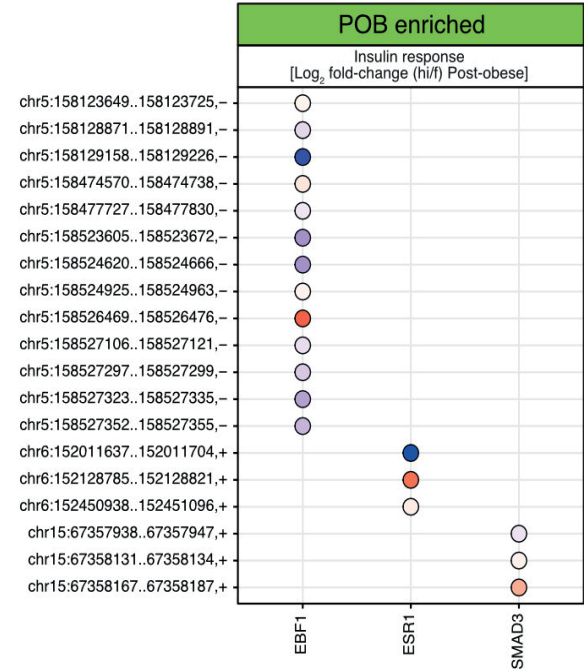

log<sub>2</sub> Fold-change (hi/f)

1

0

-1

Supplement: Supplementary file 4 [file 1]

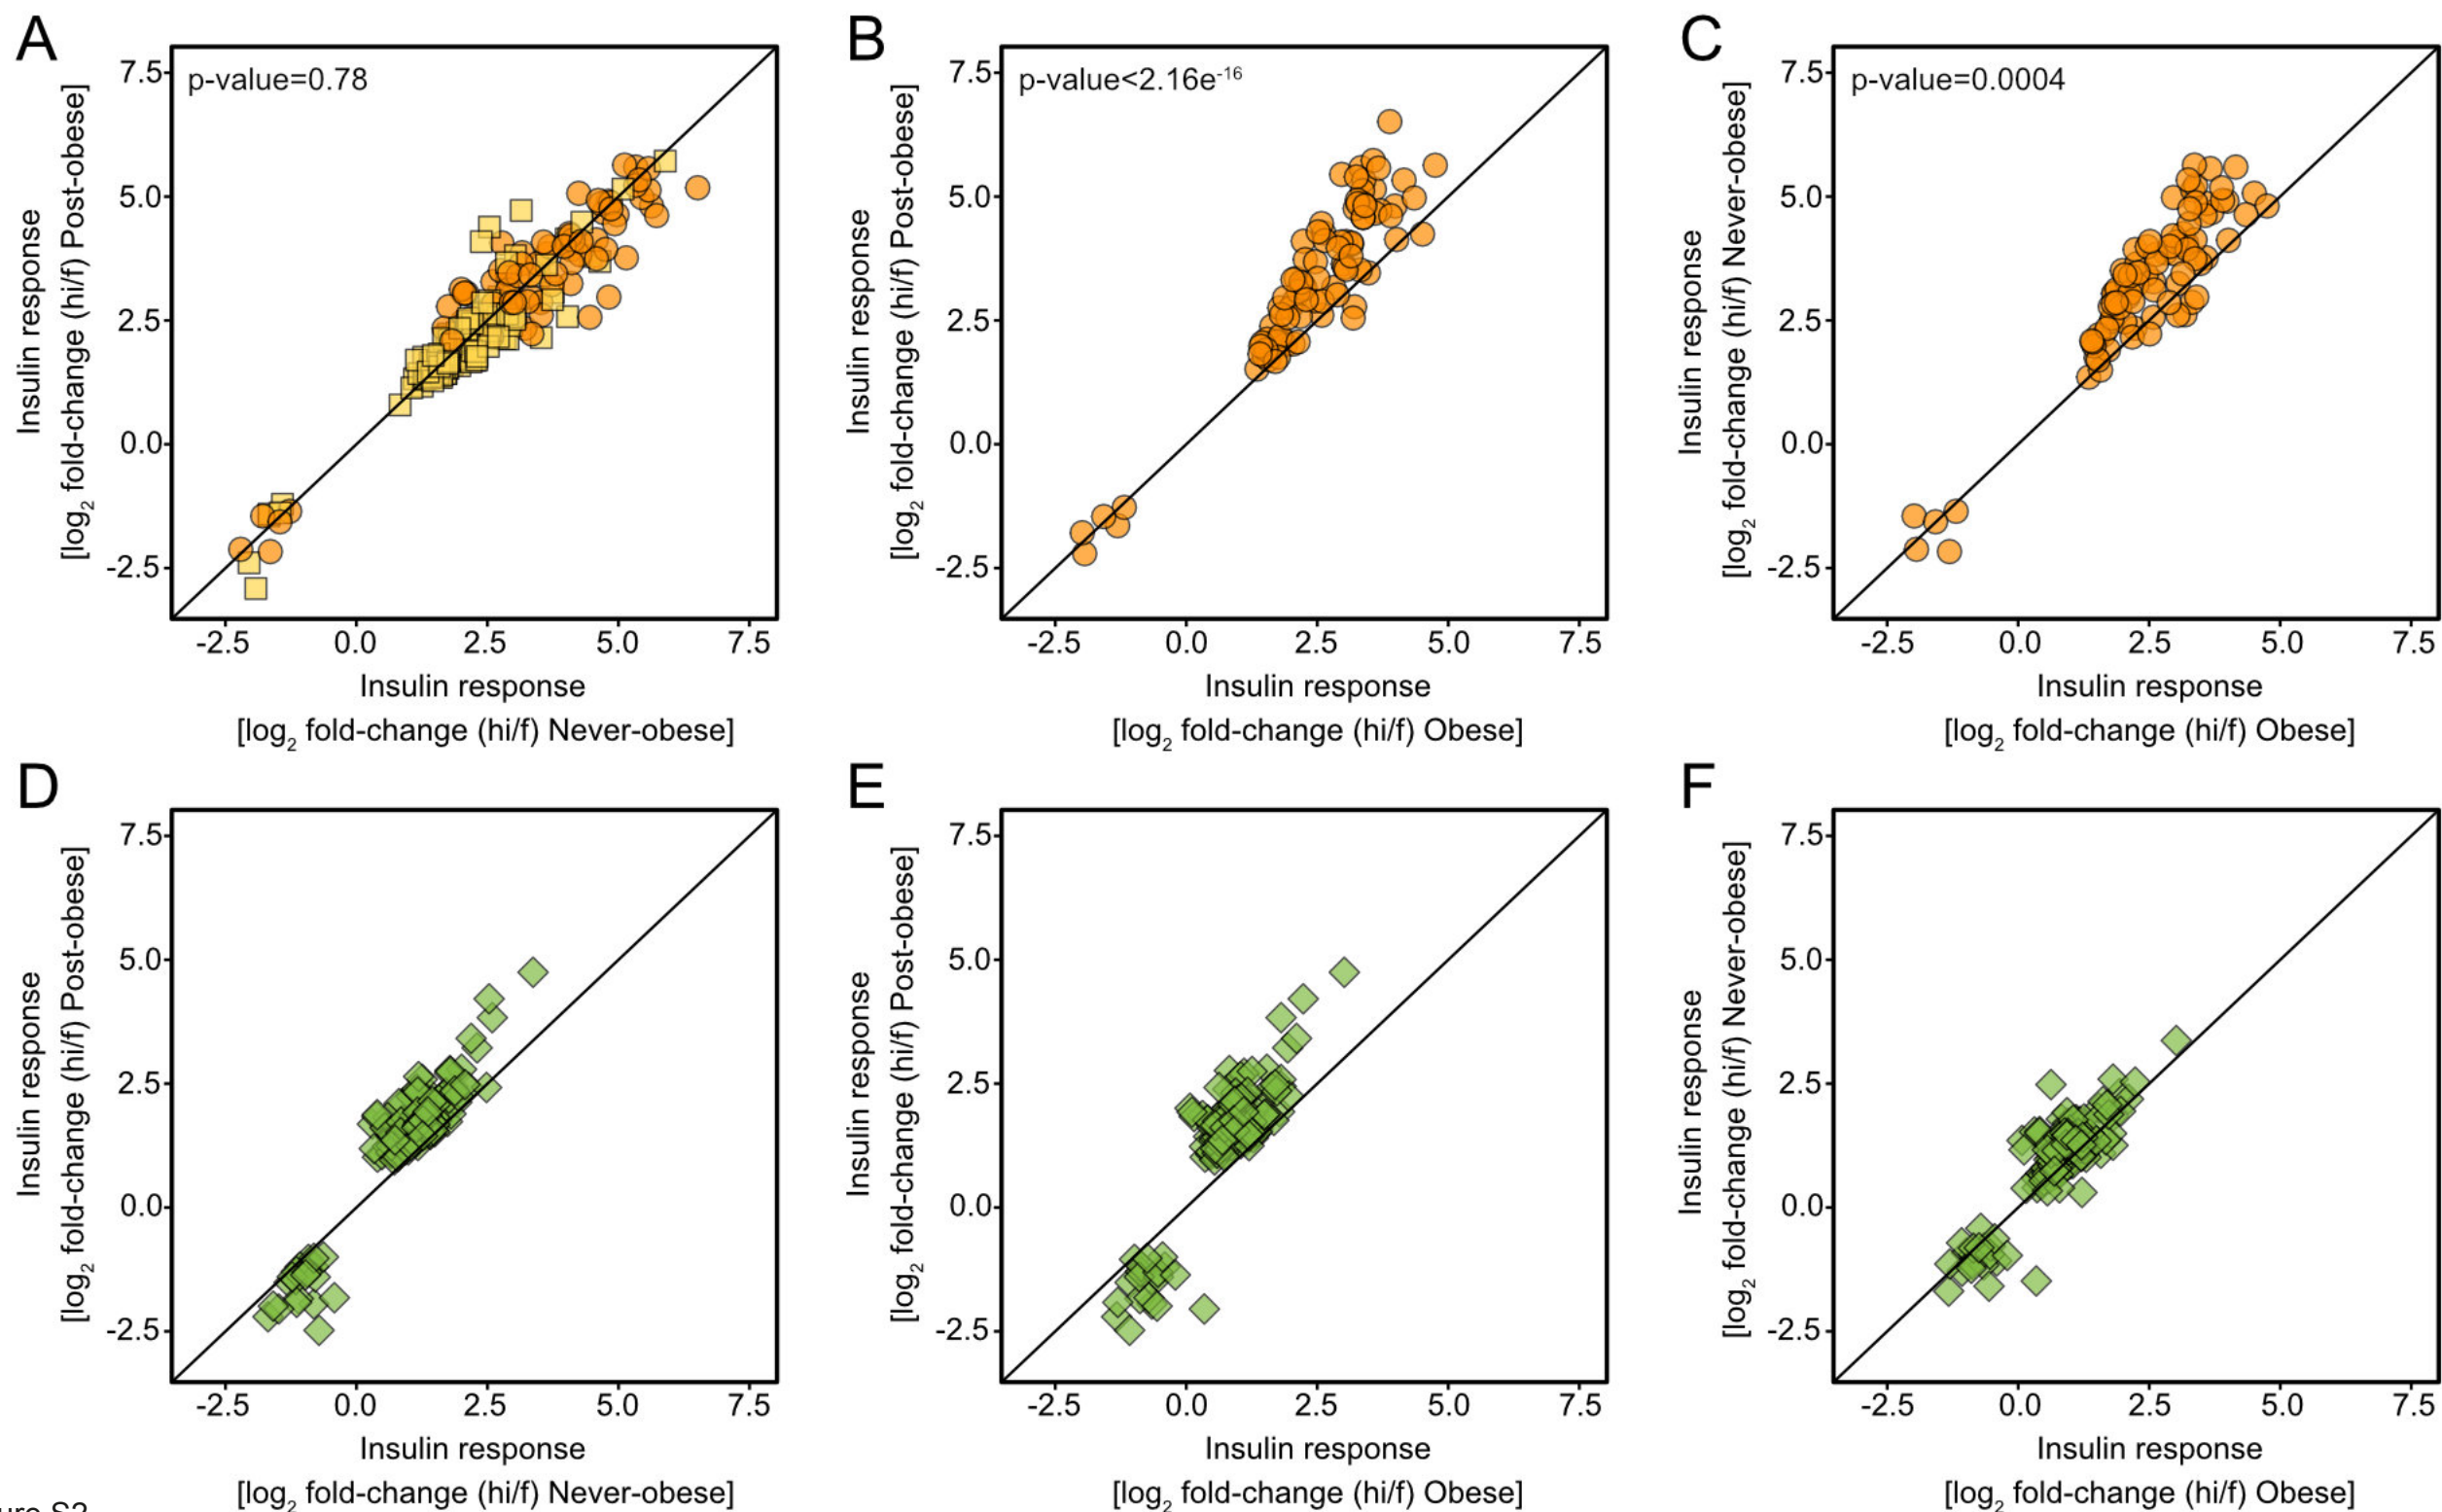

Figure S2

Supplement: Supplementary file 5 [file 1]

Figure S4

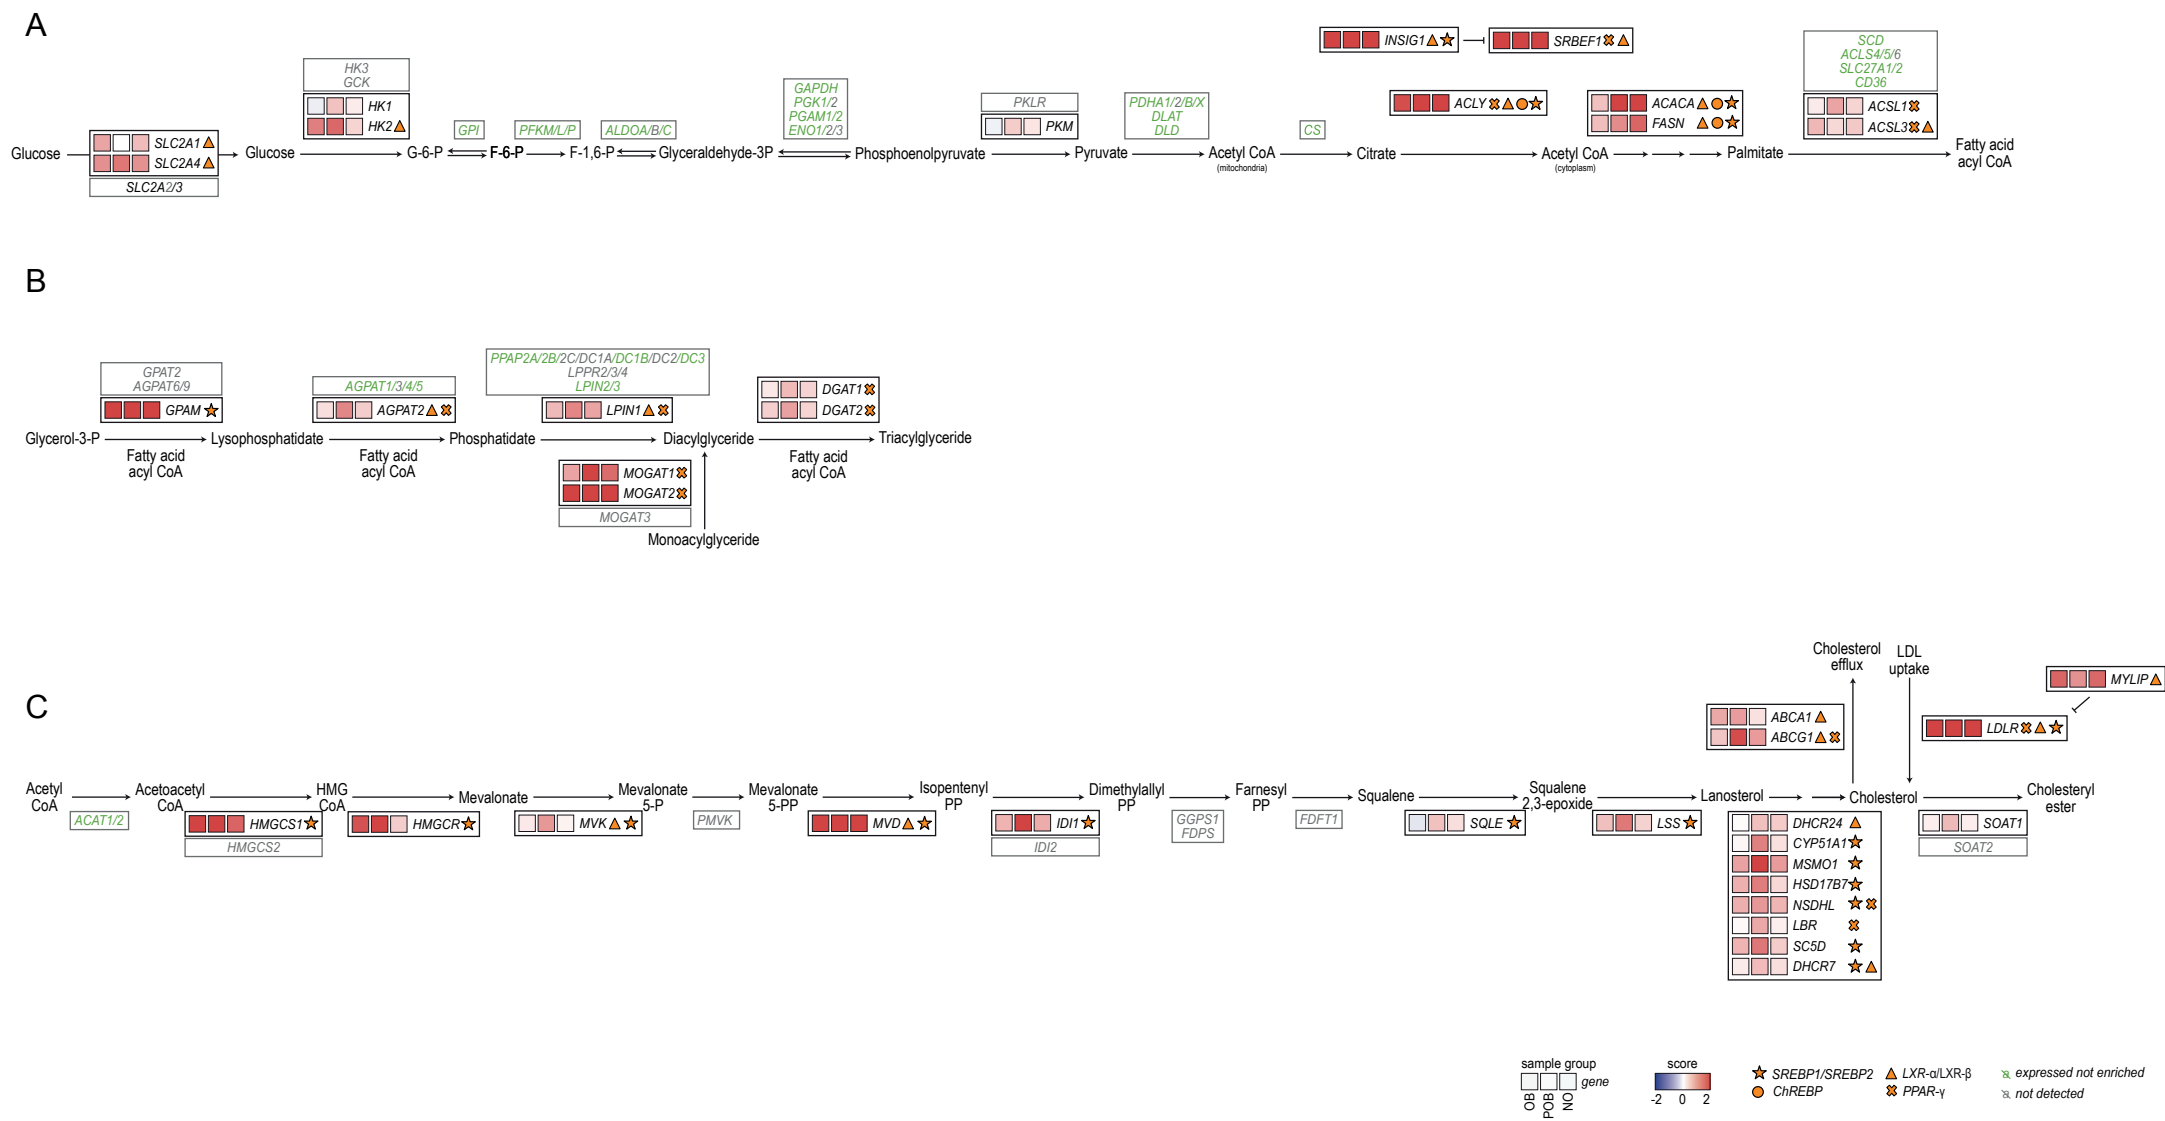

Supplement: Supplementary file 6 [file 1]
